# Supplementary material for: Viral adaptation to host: a proteome-based analysis of codon usage and amino acid preferences
Source: PubMed Central journal article supplement — Mol Syst Biol. 2009 Oct 13;5:311. doi: 10.1038/msb.2009.71 (PMC2779085; doi:10.1038/msb.2009.71), 2009-10-13

## Supplementary Information

### Viral Adaptation to Host: A proteome based analysis of codon usage and amino acid preferences

Iris Bahir<sup>1</sup>, Menachem Fromer<sup>2</sup>, Yosef Prat<sup>2</sup> and Michal Linial<sup>1,3,\*</sup>

<sup>1</sup>Department of Biological Chemistry, Institute of Life Sciences,

<sup>2</sup>School of Computer Sciences and Engineering,

<sup>3</sup>The Sudarsky Center for Computational Biology, The Hebrew University of Jerusalem, 91904, Israel

The following supplementary information is available with the online version of this paper.

**Supplementary Table S1** includes detailed information for all 121 known viruses that infect human. Data source for Figure 1B.

**Supplementary Table S2** includes the detailed table for the viruses and the hosts that are analyzed in this study.

**Supplementary data S1** shows the distance matrix for the similarity in amino acid distribution and codon usage between viruses and hosts mapped by their broad taxonomy by the 6 taxonomical groups: human, mammals - excluding human, vertebrate - excluding mammals, plants, insects, and bacteria. Data extension - Figure 4.

**Supplementary Table S3** contains the GC content for the pairs of 30 viruses and their unique hosts (IDs are according to Table 1 and supplementary Table S2). Data source for Figure 6A.

**Supplementary data S2** shows the complete distance matrix for the similarity in codon usage between pairs of 30 viruses and 30 hosts. Data extension - Figure 6B.

**Supplementary Table S4** contains the data compiled for the partition of human infecting virus proteins to functional groups. Data source for Figure 7.

## Supplementary Table S2

A list of 30 hosts and their organism ID according to NCBI taxonomy. The number of representative viruses that infect the specific hosts are listed (# Vir) as well as the sum of their proteins (# Pr). The statistical information includes the commutative number of the amino acids (# aa), the number of associated open reading frames (# ORF), the total number of the respective codons (# codons) and the average length of the viral proteins and the average number of codons for an ORF. The data only cover full length representative viruses from ViralZone (supported by SwissProt/UniProtKB). The data was used as a source for data in Figures 3-6.

|       | Viral hosts             | Host name       | NCBI TaxID | # Vir | # Pr | # aa    | # ORF | # Codons | aa / Protein | Codon / ORF |
|-------|-------------------------|-----------------|------------|-------|------|---------|-------|----------|--------------|-------------|
| HUM   | Human                   | H. sapiens      | 9606       | 23    | 1104 | 471751  | 2027  | 793917   | 427          | 392         |
|       | Squirrel                |                 |            | 1     | 75   | 33202   | 137   | 58837    |              |             |
| SQUM  | monkey                  | Saimiri         | 9520       |       |      |         |       |          | 443          | 429         |
| MAC   | Macaque                 | Macaca          | 9539       | 1     | 7    | 1704    | 16    | 2335     | 243          | 146         |
| RAT   | Rat                     | Rattus          | 10116      | 1     | 7    | 5023    | 29    | 17393    | 718          | 600         |
| MOUS  | Mouse                   | M. musculus     | 10090      | 1     | 7    | 2754    | 13    | 3556     | 393          | 274         |
| PIG   | Pig                     | S. scrofa       | 9823       | 3     | 295  | 93628   | 405   | 125470   | 317          | 310         |
| BOVN  | Bovine                  | B. bovis        | 9913       | 5     | 36   | 14567   | 61    | 23234    | 405          | 381         |
| SHP   | Sheep                   | O. aries        | 9940       | 1     | 28   | 8976    | 28    | 9004     | 321          | 322         |
| HORS  | Horse                   | E. caballus     | 9788       | 1     | 7    | 1136    | 24    | 2385     | 162          | 99          |
| CAT   | Cat                     | F. domesticus   | 9685       | 1     | 2    | 774     | 2     | 776      | 387          | 388         |
| DOG   | Dog                     | C. canis        | 9615       | 1     | 7    | 2357    | 14    | 5113     | 337          | 365         |
| CHK   | Chicken                 | G. gallus       | 9031       | 3     | 103  | 46673   | 532   | 189090   | 453          | 355         |
| MOSQ  | Tiger mosquito          | A. Albopictus   | 7160       | 1     | 3    | 1532    | 3     | 1543     | 511          | 514         |
| COMO  | Codling moth            | C. Pomonella    | 82600      | 1     | 143  | 36936   | 145   | 37370    | 258          | 258         |
| CHIL  | Rice stem borer         | C. suppressalis | 168631     | 1     | 468  | 77552   | 468   | 78020    | 166          | 167         |
| AMMO  | Noctuid moth            | S. Frugiperda   | 7108       | 1     | 122  | 37391   | 136   | 43519    | 306          | 320         |
| ARAB  | Arabidopsis             | C. Hayek        | 3701       | 1     | 5    | 1624    | 5     | 1629     | 325          | 326         |
| LET   | Lettuce                 | L. sativa       | 4236       | 1     | 6    | 3857    | 13    | 8186     | 643          | 630         |
| RICE  | Rice                    | O. sativa       | 4530       | 2     | 6    | 1436    | 6     | 1235     | 239          | 206         |
| TOM   | Tomato                  | S. lycopersicum | 4081       | 4     | 16   | 3840    | 21    | 4993     | 240          | 238         |
| BACI  | Bacillus subtilis       |                 | 1423       | 1     | 27   | 6064    | 32    | 6374     | 225          | 199         |
|       | Chlamydia psittaci      |                 | 83554      | 1     | 8    | 1648    | 12    | 2268     |              |             |
| CHLM  | Enterococcus faecalis   |                 | 1351       | 1     | 221  | 42234   | 126   | 14526    | 206          | 189         |
| ENCO  | Lactococcus             |                 | 1357       | 1     | 39   | 6900    | 40    | 7181     | 191          | 115         |
| LACO  | Mycobacteria            |                 | 1763       | 1     | 85   | 15251   | 86    | 15669    | 177          | 180         |
| MYBC  | Mycoplasma              |                 | 2093       | 1     | 14   | 3272    | 14    | 3287     | 179          | 182         |
| MYPL  | Pseudomonas syringae    |                 | 317        | 1     | 5    | 866     | 5     | 871      | 234          | 235         |
| PSDO  | Salmonella typhimurim   |                 | 602        | 1     | 56   | 10207   | 174   | 31106    | 173          | 174         |
| SALM  | Streptomyces coelicolor |                 | 1902       | 1     | 53   | 12454   | 67    | 15392    | 182          | 179         |
| STRP  | Escherichia coli        |                 | 562        | 1     | 708  | 154167  | 1375  | 273272   | 235          | 230         |
| ECOL  |                         |                 |            | 1     | 708  | 154167  | 1375  | 273272   | 218          | 199         |
| total |                         |                 |            | 64    | 3663 | 1099776 | 6016  | 1777551  | 310          | 287         |

### Supplementary Table S3

GC content (in percentage) for the pairs of 30 viruses and their hosts is shown. The abbreviate names refer to the list in Additional data file 2 and Table I.

|    | <b>ID</b> | <b>GC - Host</b> | <b>GC-Virus</b> |
|----|-----------|------------------|-----------------|
| 1  | HUM       | 0.5066           | 0.5574          |
| 2  | SQUM      | 0.5047           | 0.3555          |
| 3  | MAC       | 0.4977           | 0.4194          |
| 4  | RAT       | 0.5119           | 0.4689          |
| 5  | MOUS      | 0.5200           | 0.4233          |
| 6  | PIG       | 0.5254           | 0.3523          |
| 7  | BOVN      | 0.5315           | 0.4180          |
| 8  | SHP       | 0.5167           | 0.3405          |
| 9  | HORS      | 0.5102           | 0.4759          |
| 10 | CAT       | 0.5246           | 0.4372          |
| 11 | DOG       | 0.5103           | 0.4332          |
| 12 | CHK       | 0.5208           | 0.4399          |
| 13 | MOSQ      | 0.4862           | 0.3969          |
| 14 | COMO      | 0.4594           | 0.4679          |
| 15 | CHIL      | 0.3999           | 0.2985          |
| 16 | AMMO      | 0.5075           | 0.5137          |
| 17 | ARAB      | 0.4471           | 0.3976          |
| 18 | LET       | 0.4024           | 0.4385          |
| 19 | RICE      | 0.5414           | 0.4607          |
| 20 | TOM       | 0.4197           | 0.4165          |
| 21 | BACI      | 0.3958           | 0.4016          |
| 22 | CHLM      | 0.4141           | 0.3673          |
| 23 | ENCO      | 0.3781           | 0.3575          |
| 24 | LACO      | 0.3632           | 0.3673          |
| 25 | MYBC      | 0.6683           | 0.625           |
| 26 | MYPL      | 0.2984           | 0.3208          |
| 27 | PSDO      | 0.5957           | 0.5694          |
| 28 | SALM      | 0.5297           | 0.4823          |
| 29 | STRP      | 0.7193           | 0.6391          |
| 30 | ECOL      | 0.5149           | 0.3993          |

## Supplementary data S1

Illustration for the  $L_2$  distance values between human and mammalian viruses (excluding human) and 6 tested hosts groups as indicated (A). Note that a smaller  $L_2$  value indicates high resemblance. The analysis was performed for all pairwise distances and the results were scaled according to the colored ruler (B). (see Materials and Methods and details in legend of Figure 4).

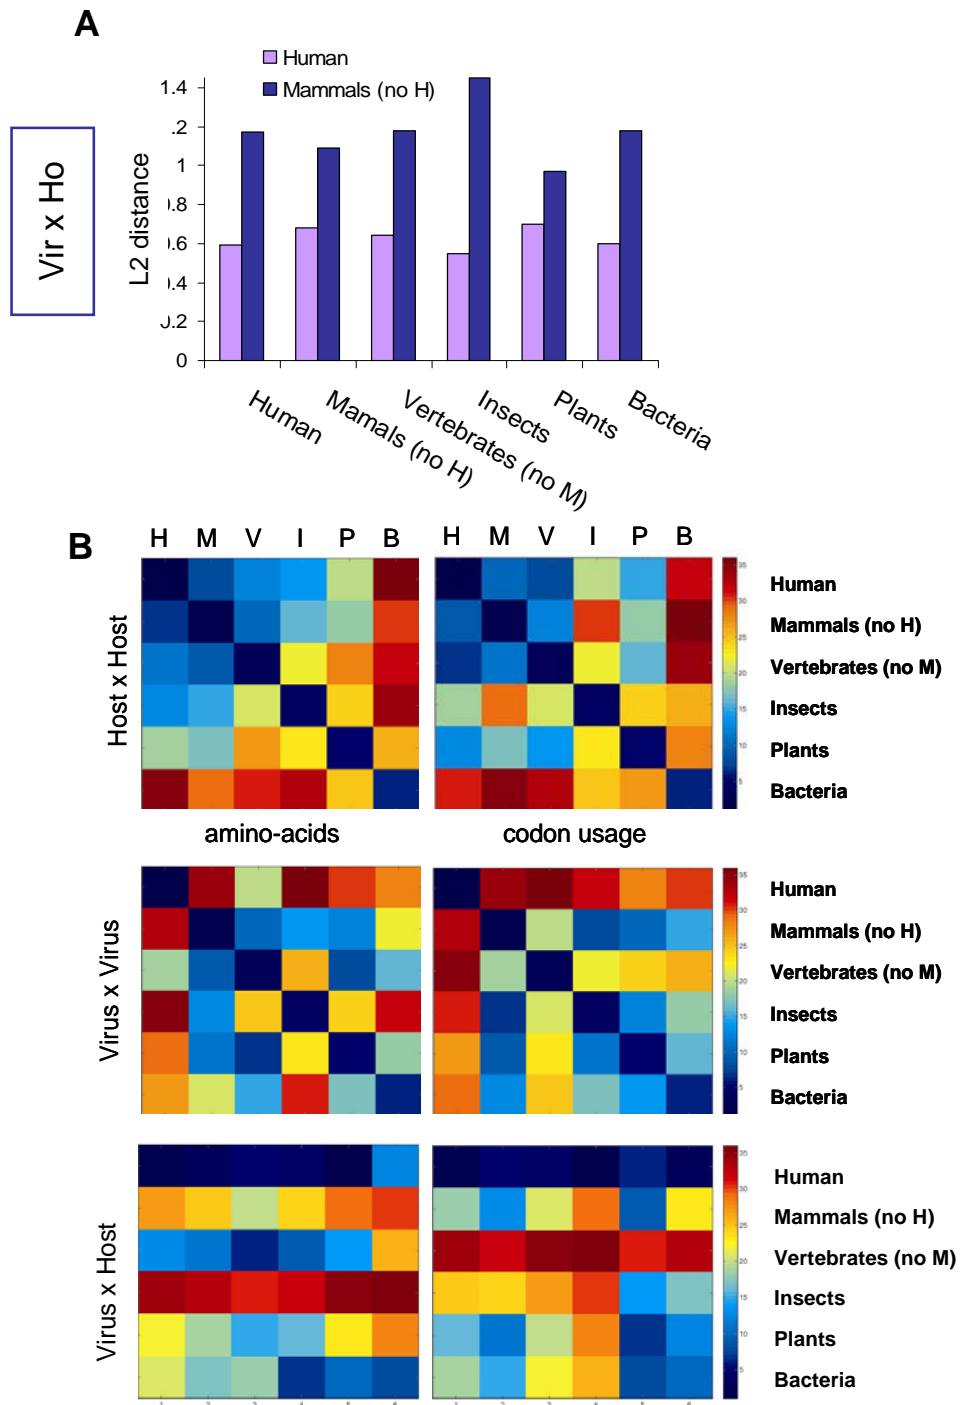

### Supplementary data S2

A distance matrix based on the  $L_2$  measure for the similarity in codon usage between 30 pairs of viruses and hosts. For details see legend of Figure 6. The abbreviation of the hosts (X-axis) and their viruses (Y-axis) are listed in Additional data file 2 and Table I. The colors used in the abbreviate names are as appears in legend of Figure 6A.

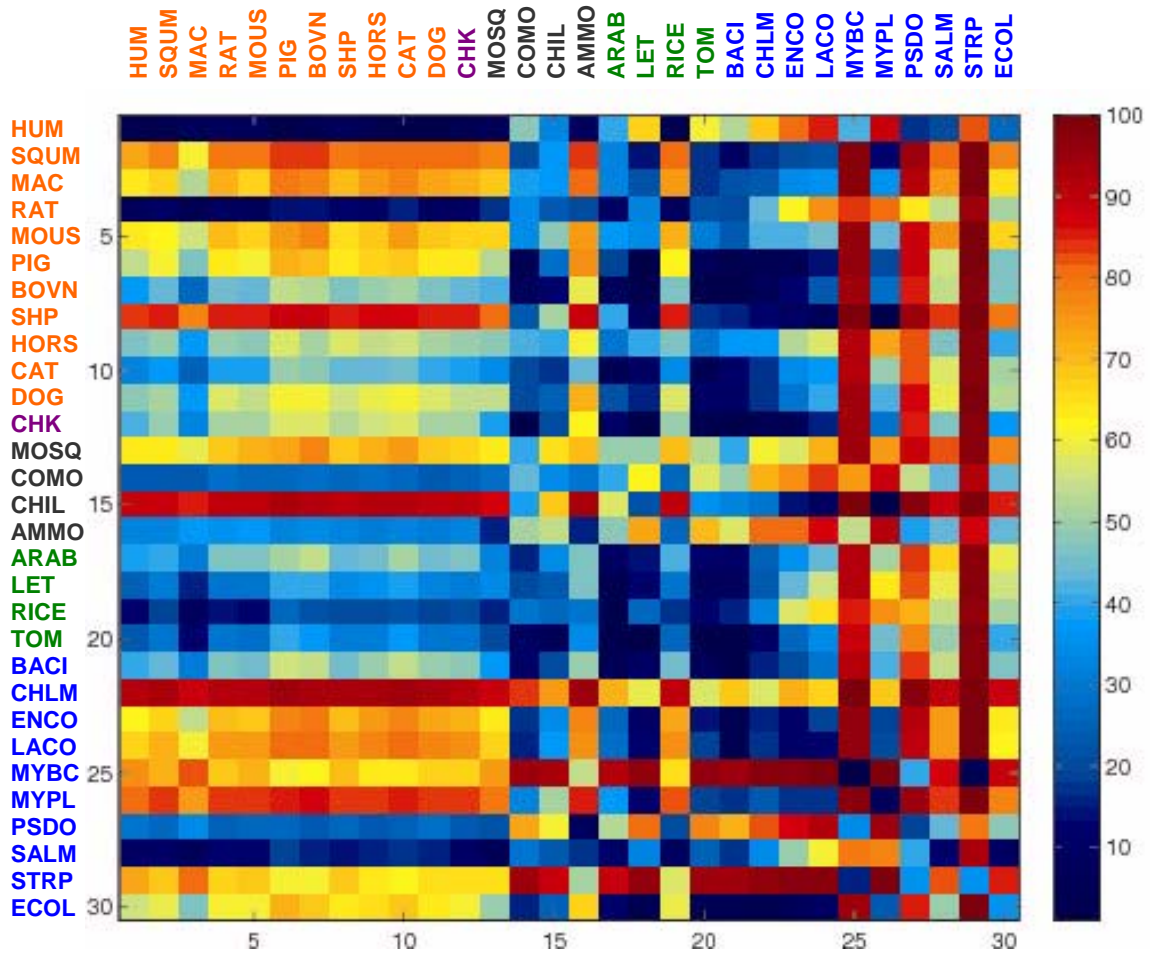

Supplement: msb200971-s1.pdf [file msb200971-s1.pdf]
